# Supplementary material for: Delineation of proteolytic and non-proteolytic functions of the membrane-anchored serine protease prostasin
Source: Oxford University Press journal article supplement (doi:10.1242/dev.137968), 2016-07-07
Supplement: dev137968supp.pdf [file dev137968supp.pdf]

**Table S1.** Sequences of PCR primers used for mouse genotyping

|                                                            |                                 |                |
|------------------------------------------------------------|---------------------------------|----------------|
| <b>Detection of <i>Spint1</i> alleles</b>                  |                                 | <b>Ta=55°C</b> |
| WT Forward                                                 | 5'-ctgtctgtttacctgtctcg-3'      |                |
| WT Reverse                                                 | 5'-taaagggatgttgcctggg-3'       |                |
| KO Forward                                                 | 5'-gagaattcctagaggtacc-3'       |                |
| KO Reverse                                                 | 5'-ggtagttgagggaacatggc-3'      |                |
| <b>Detection of <i>Spint2</i> alleles</b>                  |                                 | <b>Ta=55°C</b> |
| WT Forward                                                 | 5'-aacacatttcaccaccatgc-3'      |                |
| WT Reverse                                                 | 5'-ccagacttcctaagtggg-3'        |                |
| KO Forward                                                 | 5'-atctgcaacctcaagctagc-3'      |                |
| KO Reverse                                                 | 5'-cagaaccagcaactgaagg-3'       |                |
| <b>Detection of <i>St14</i> alleles</b>                    |                                 | <b>Ta=55°C</b> |
| WT Forward                                                 | 5'-cagtgtgttcagcttctctt-3'      |                |
| KO Forward                                                 | 5'-gcatgctccagactgcctg-3'       |                |
| WT and KO Reverse                                          | 5'-gtggaggtggagtctcatagc-3'     |                |
| <b>Detection of <i>Prss8</i> null and wildtype alleles</b> |                                 | <b>Ta=55°C</b> |
| WT Forward                                                 | 5'-ccaacggccttactgtactgt-3'     |                |
| <i>fr</i> Forward                                          | 5'-tttccaacggccttactgtactga-3'  |                |
| WT and <i>fr</i> Reverse                                   | 5'-ccctccatgggacaagagagt-3'     |                |
| <b>Detection of <i>Prss8</i> knockin alleles</b>           |                                 | <b>Ta=55°C</b> |
| Forward                                                    | 5'-gcagctcgaggtaccactcatcagc-3' |                |
| Reverse                                                    | 5'-aactcacaatgctgccaagtacc-3'   |                |

**Table S2.** List of primary antibodies used in the study

| <b>Immunohistochemistry</b>   |                                            |                 |                      |
|-------------------------------|--------------------------------------------|-----------------|----------------------|
| <b>Primary</b>                |                                            |                 |                      |
| <b>Antigen</b>                | <b>Manufacturer</b>                        | <b>Cat. No.</b> | <b>Concentration</b> |
| CD31/PECAM-1                  | Santa Cruz Biotechnology, Santa Cruz, CA   | sc-1506-R       | 2 ug/ml              |
| HAI-1                         | R&D Systems, Minneapolis, MN               | AF1048          | 1 ug/ml              |
| Matriptase                    | R&D Systems                                | AF3926          | 2 ug/ml              |
| Prostasin                     | BD Transduction Laboratories, San Jose, CA | 612173          | 2 ug/ml              |
| <b>Secondary</b>              |                                            |                 |                      |
| Anti-mouse                    | Vector Laboratories, Burlingame, CA        | BA-9200         | 2.5 ug/ml            |
| Anti-goat                     | Vector Laboratories                        | BA-5000         | 2.5 ug/ml            |
| Anti-rabbit                   | Vector Laboratories                        | BA-1000         | 2.5 ug/ml            |
| Anti-sheep                    | Pierce, Rockford, IL                       | 31840           | 2.5 ug/ml            |
| <b>Western Blot</b>           |                                            |                 |                      |
| <b>Primary</b>                |                                            |                 |                      |
| Matriptase                    | R&D Systems                                | AF3926          | 1 ug/ml              |
| Prostasin (tissues)           | BD Transduction Laboratories               | 612173          | 1 ug/ml              |
| Prostasin (complex formation) | R&D Systems                                | AF4599          | 0.5 ug/ml            |
| <b>Secondary</b>              |                                            |                 |                      |
| Anti-sheep                    | Sigma, St.Louis, MO                        | A5187           | 1 ug/ml              |
| Anti-mouse                    | Dako Cytomation, Carpinteria, CA           | D0486           | 1 ug/ml              |
